# Supplementary material for: Disruption to schizophrenia-associated gene Fez1 in the hippocampus of HDAC11 knockout mice
Source: PubMed Central journal article supplement (PMC5605701; doi:10.1038/s41598-017-11630-1), 2017-09-19
Supplement: 41598_2017_11630_MOESM1_ESM.pdf [file 41598_2017_11630_MOESM1_ESM.pdf]

## Supplementary Information

### **Disruption to schizophrenia-associated gene *Fez1* in the hippocampus of HDAC11 knockout mice**

Dale T. Bryant<sup>1,2</sup>, Christian Landles<sup>1</sup>, Aikaterini S. Papadopoulou<sup>1</sup>, Agnesska C. Benjamin<sup>1</sup>, Joshua K. Duckworth<sup>2</sup>, Thomas Rosahl<sup>3</sup>, Caroline L. Benn<sup>2\*</sup> and Gillian P. Bates<sup>1\*</sup>

<sup>1</sup>UCL Huntington's Disease Centre, Sobell Department of Motor Neuroscience, UCL Institute of Neurology, University College London, London, United Kingdom

<sup>2</sup>Neusentis, Pfizer Ltd, The Portway, Granta Park, Abington, Cambridge, United Kingdom

<sup>3</sup>Merck & Co., Inc., Kenilworth, NJ, USA

## Supplementary Figure 1

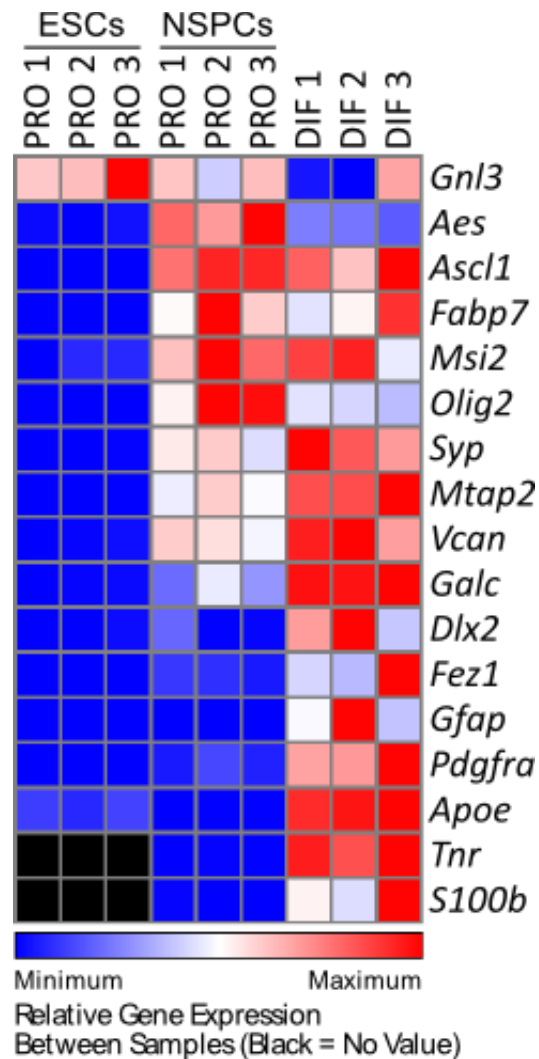

**Supplementary Figure 1: Expression profile of neural associated genes as mESCs were induced to acquire a maturing neural phenotype.** Relative expression of genes associated with neural proliferation in mESC-derived neural cells between proliferating mESCs (ESC, PRO), subsequently derived proliferating neural cells (NSPC, PRO) and finally following 3 days of differentiation (DIF) inducing conditions. The heat map displays relative expression values between samples (i.e. across rows). Gene expression was normalised to the mean of *Canx* and *Sdha*.

## Supplementary Figure 2

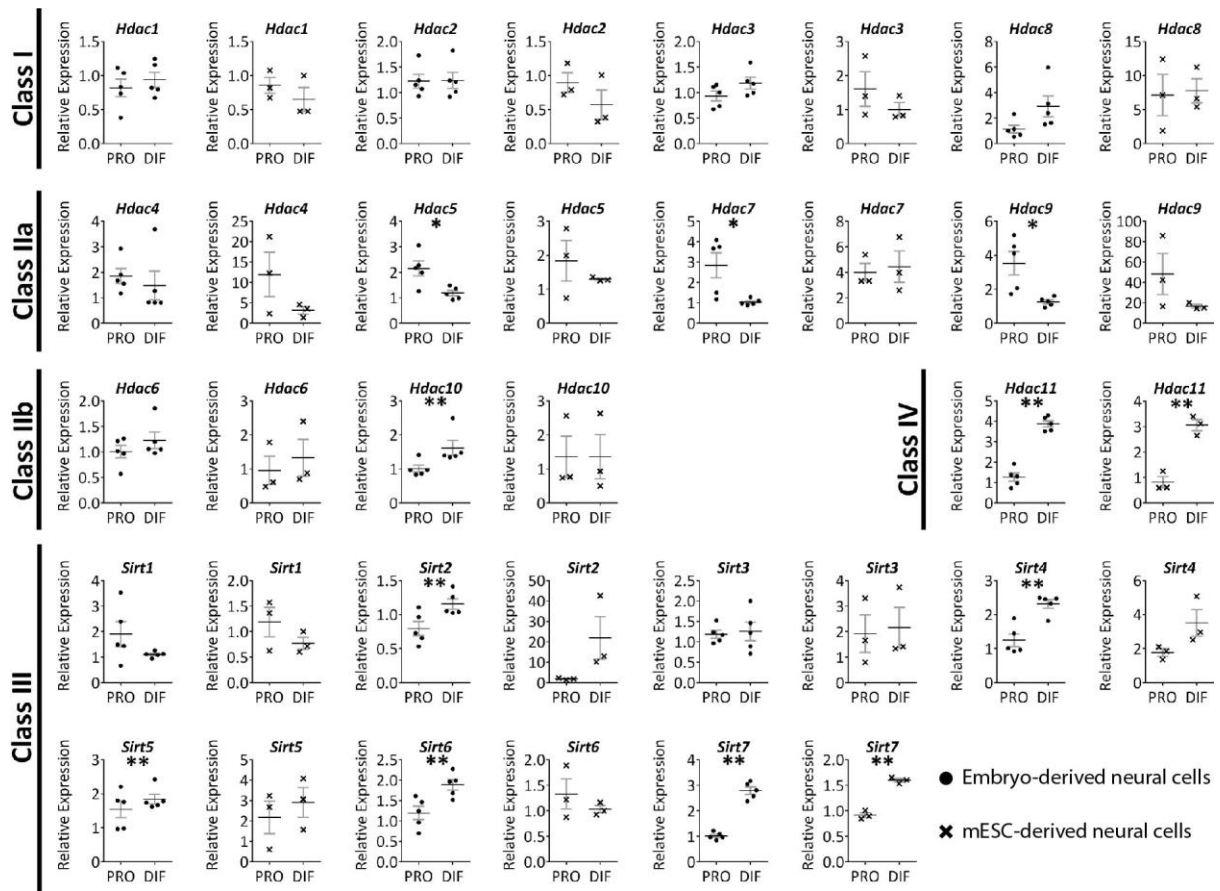

**Supplementary Figure 2: Expression pattern of all *Hdacs* during *in vitro* neural differentiation.** The expression of all *Hdac* genes were examined during the transition from proliferating neural cells to differentiating neural cells. This expression pattern is displayed for both E14 mouse embryo-derived neural cells (circles) and mESC derived neural cells (crosses). Neural cells had either been maintained in proliferation inducing NSC media (PRO) or differentiation inducing N2B27 media (DIF) for 3 days. For mESC-derived neural cells:  $N = 3$ ; for E14.5 mouse-derived neural cells:  $N = 5$ , circles/crosses = individual sample values, bars = mean  $\pm$  SE, \* $p < 0.05$ , \*\* $p < 0.01$ , two-tailed paired Student's *t*-test (embryo-derived neural cells), one-tailed paired Student's *t*-test (mESC-derived neural cells). Gene expression was normalised to the geomean of *Ubc*, *Actb* and *Eif4a2*.

### Supplementary Figure 3

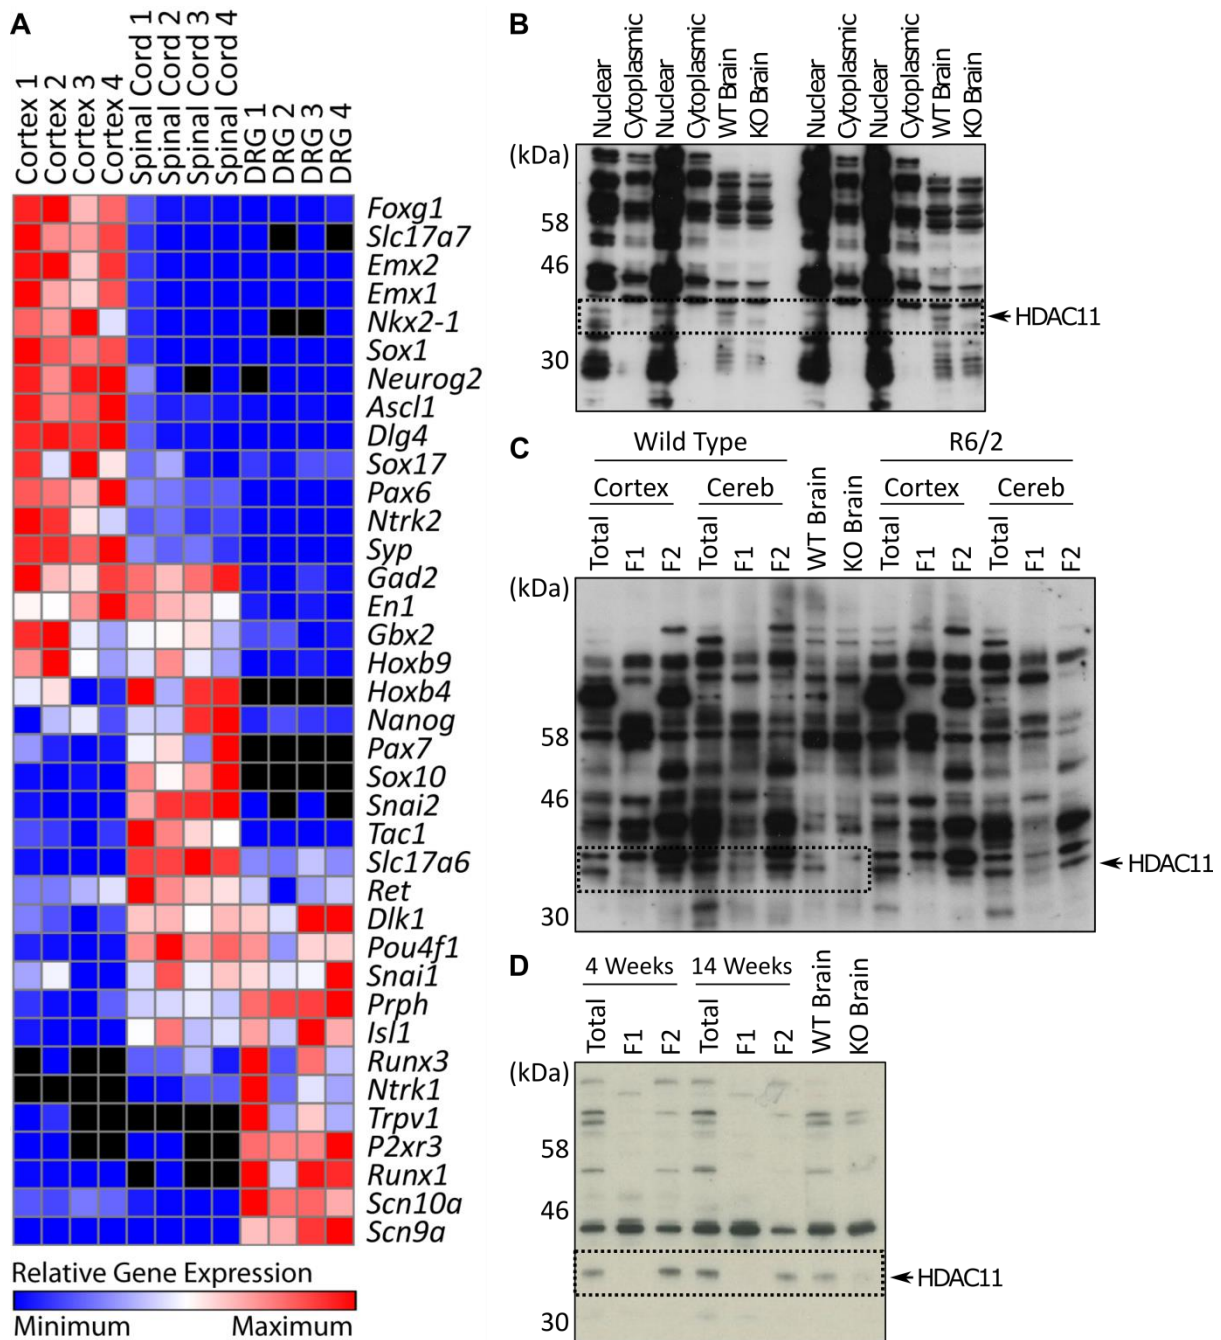

**Supplementary Figure 3: Gene expression profile in dissected tissue and full display of HDAC11 western blots loaded with nuclear, cytoplasmic and synaptic fractions.** **A)** Validation of mouse dorsal root ganglion (DRG) dissections by gene expression profile. The full names of the genes and assays used are listed in Supplementary Table 4. Gene expression was normalised to the mean of *Canx* and *Sdha*. **B)** Immunoreactivity of HDAC11 antibody (Sigma, Catalog #H4539) on nuclear and cytoplasmic fractions from mouse brain (Corresponds to Fig. 3C). **C)** Immunoreactivity of HDAC11 antibody (Sigma, Catalog #H4539) on fractions isolated during the enrichment of synaptic proteins from mouse cortex and cerebellum (Corresponds to Fig. 3D). **D)** Immunoreactivity of HDAC11 antibody (Abcam, Catalog #Ab18973) on fractions isolated during the enrichment of synaptic proteins from mouse cortex at 4 and 14 weeks of age (Corresponds to Fig. 3E). Dotted boxes indicate location of cropped images displayed in Fig. 3.

### Supplementary Figure 4

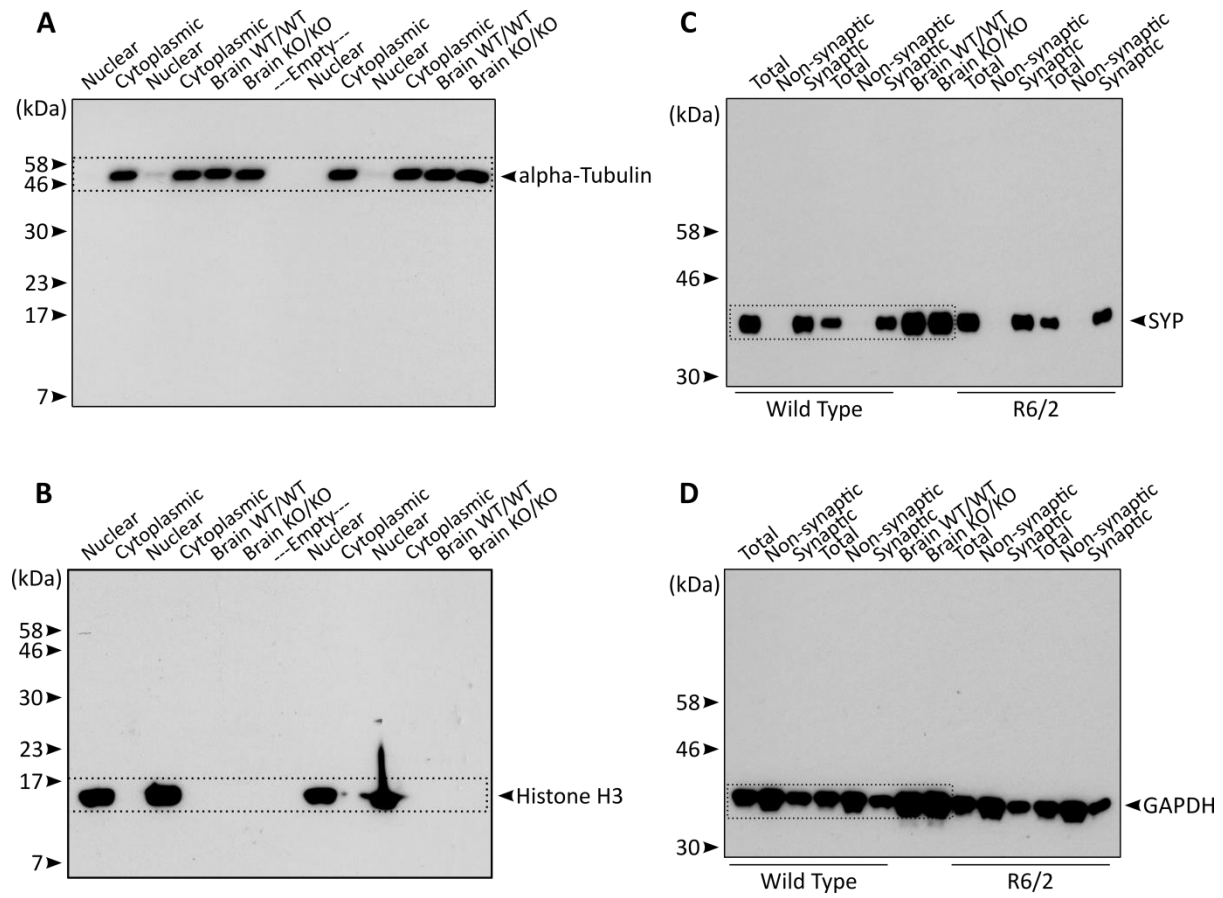

**Supplementary Figure 4: Whole western blots for reference proteins displayed in Fig. 3C and Fig 3D. Perforated boxes indicate location of cropped images.**

## Supplementary Figure 5

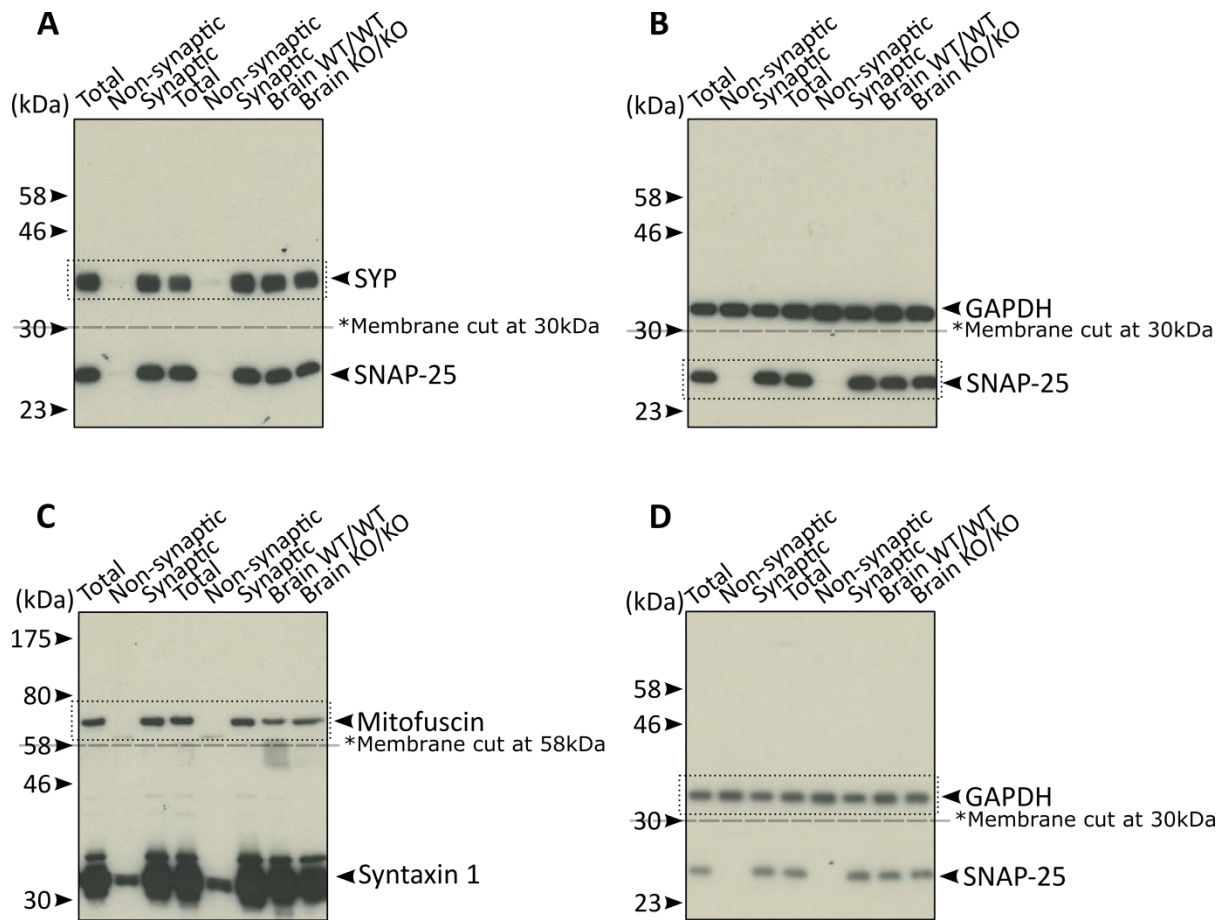

**Supplementary Figure 5: Whole western blots for reference proteins displayed in Fig. 3E.** Perforated boxes indicate location of cropped images. \*Membranes were cut as indicated and probed with the annotated antibodies.

## Supplementary Figure 6

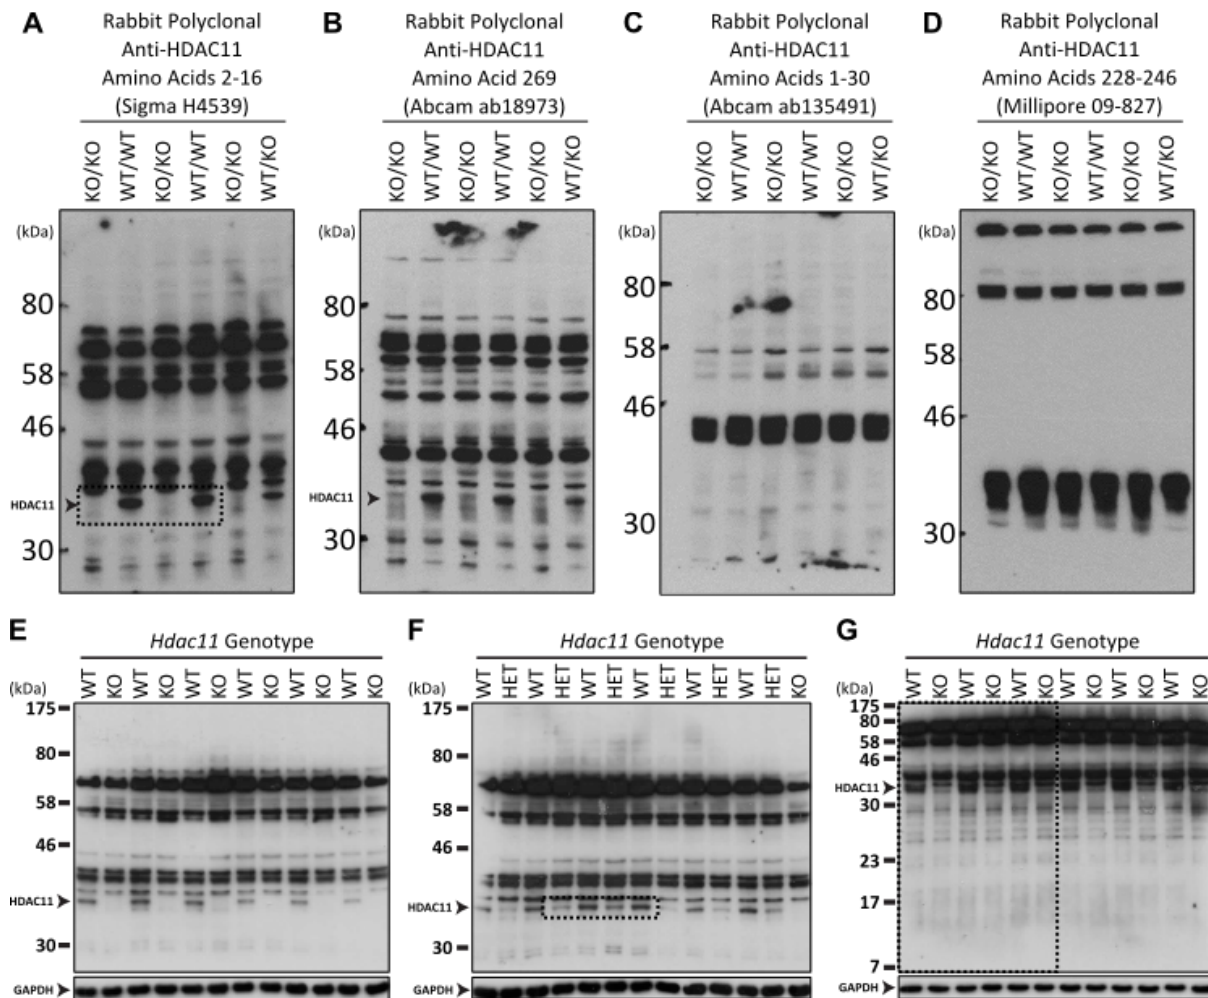

**Supplementary Figure 6: Immunoreactivity of HDAC11 antibodies on *Hdac11*<sup>KO/KO</sup> brain tissue.** Immunoreactivity of HDAC11 antibodies **A**) Sigma, Catalog #H4539 (Corresponds to Figure 4E), **B**) Abcam, Catalog #Ab18973, **C**) Abcam, Catalog #Ab135491, and **D**) Millipore, Catalog #09-827 on *Hdac11*<sup>WT/WT</sup>, *Hdac11*<sup>KO/KO</sup> and *Hdac11*<sup>WT/KO</sup> mouse brain lysates. Full display of western blot loaded with **E**) *Hdac11*<sup>WT/WT</sup> and *Hdac11*<sup>KO/KO</sup> mouse brain lysates; **F**) *Hdac11*<sup>WT/WT</sup> and *Hdac11*<sup>WT/KO</sup> mouse brain lysates (Corresponds to Fig. 4F); and **G**) *Hdac11*<sup>WT/WT</sup> and *Hdac11*<sup>KO/KO</sup> mouse brain lysates blotted with retained low molecular weight protein on the gel (Corresponds to Fig. 4G). Antibody used in panels 4E and 4F is anti-HDAC11 (Sigma, Catalogue #H4539). Dotted boxes indicate location of cropped images displayed in Fig. 4.



Supplementary Figure 7

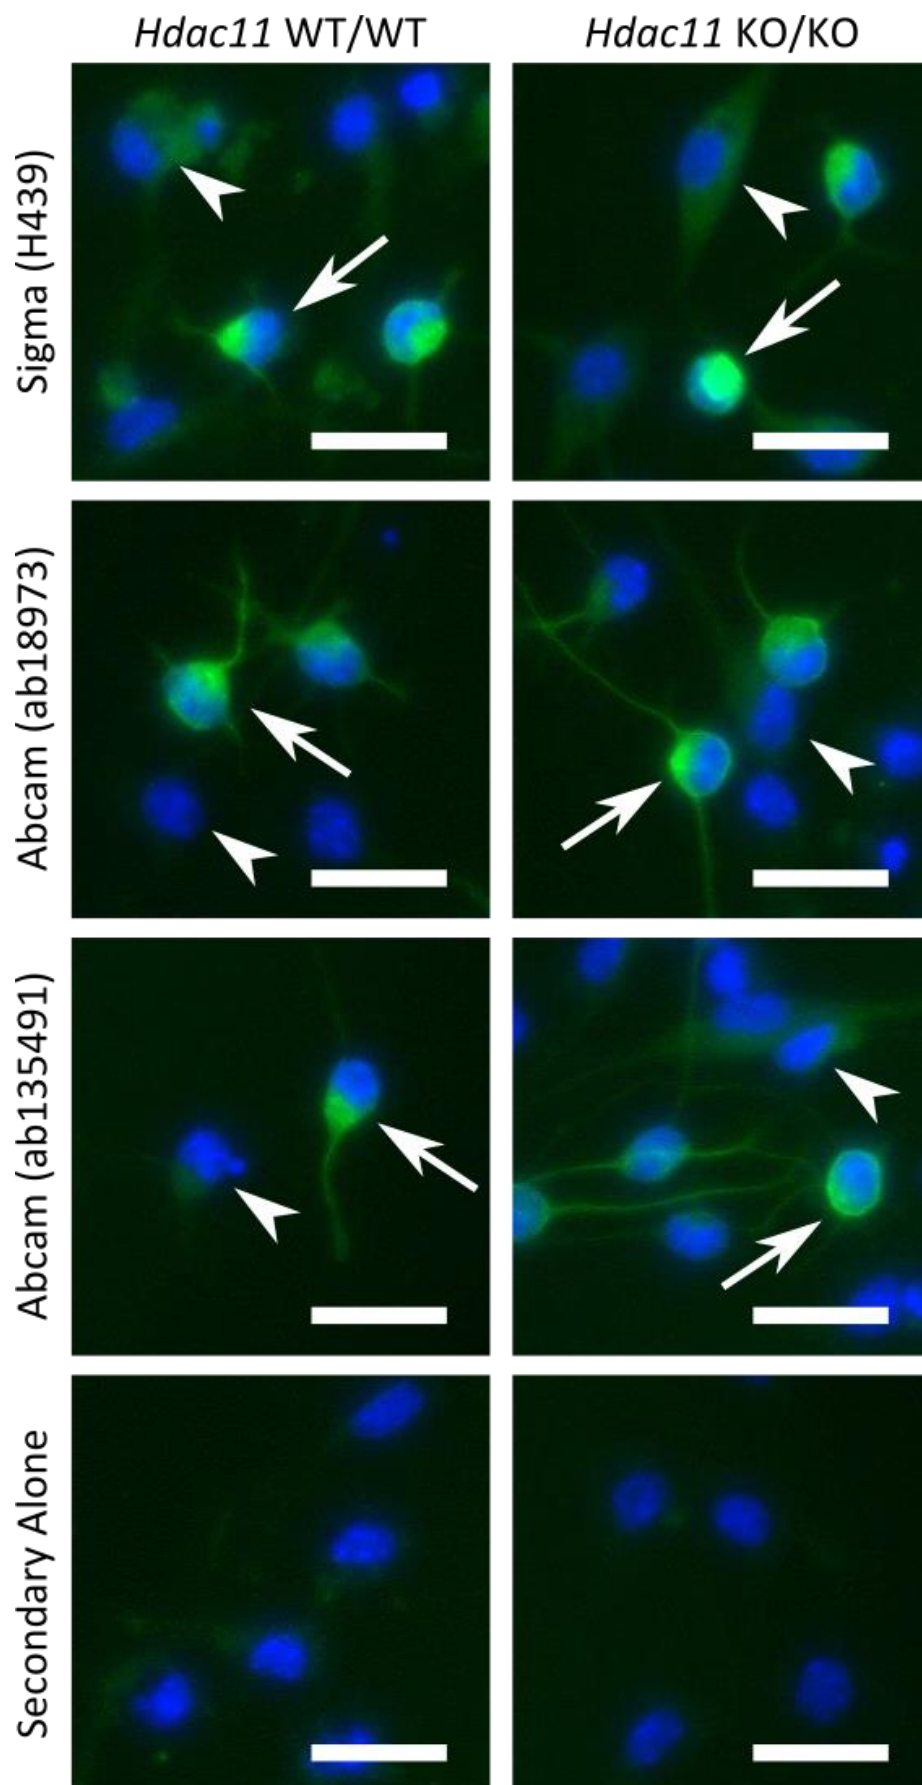

**Supplementary Figure 7: Immunoreactivity of HDAC11 antibodies examined by fluorescent microscopy.** Immunoreactivity of HDAC11 antibodies with mouse-derived neural cells following 4 days of differentiation as assessed by fluorescent microscopy. The pattern of immunoreactivity with each antibody was similar in *Hdac11*<sup>WT/WT</sup> and *Hdac11*<sup>KO/KO</sup> neural cell populations. A subpopulation of cells with neuronal morphology were positive for immunoreactivity with all HDAC11 antibodies in both *Hdac11*<sup>WT/WT</sup> and *Hdac11*<sup>KO/KO</sup> neural cells (arrows). Many cells that typically had fibrous morphology displayed little to no immunoreactivity with the HDAC11 antibody in both *Hdac11*<sup>WT/WT</sup> and *Hdac11*<sup>KO/KO</sup> neural cells (arrow heads). Green Signal = Immunoreactivity of HDAC11 antibodies, Blue signal = Hoechst/Nuclei, Scale bar = 20  $\mu$ m.

## Supplementary Figure 8

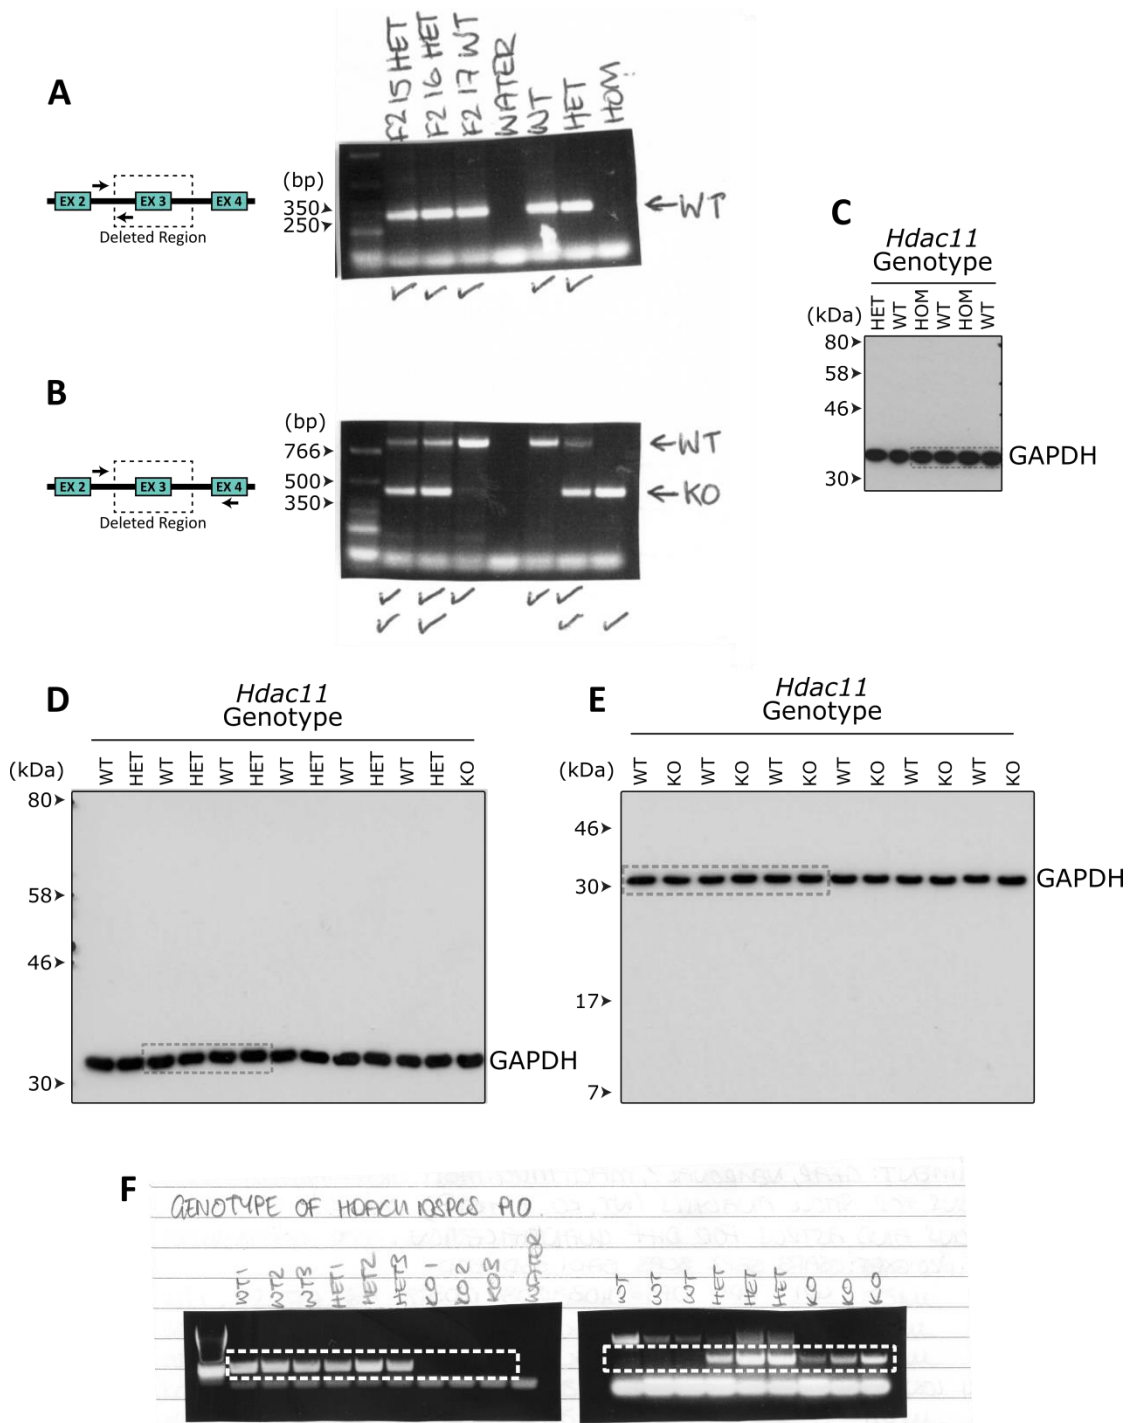

**Supplementary Figure 8: Whole blots for reference proteins and DNA gels displayed in Fig. 4 and Fig. 6. A,B)** Examples of uncropped DNA gels used for genotyping mice from the HDAC11 knockout line with the two different primer pairs. The samples in in panel B are those listed above panel A. **C-E)** Whole western blots for reference proteins displayed in Fig. 4. **F)** Uncropped DNA gels for genotypes shown in Fig. 6A. Dotted boxes indicate location of cropped images.

## Supplementary Figure 9

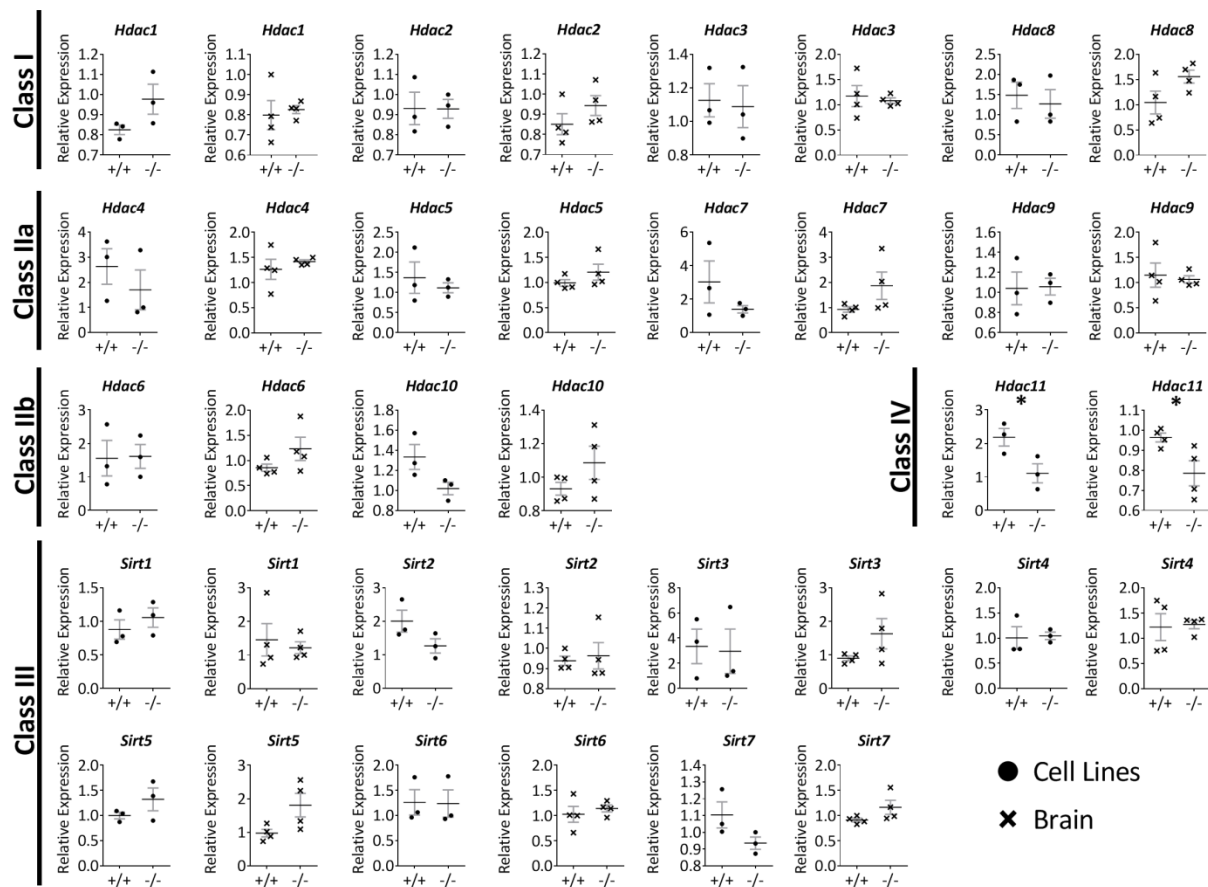

**Supplementary Figure 9: Relative expression of all *Hdacs* in *Hdac11*<sup>WT/WT</sup> and *Hdac11*<sup>KO/KO</sup> tissue.** Proliferating neural cell lines derived from *Hdac11*<sup>KO/KO</sup> mice were induced to differentiate for 3 days *in vitro*. The expression of all *Hdac* genes was examined in these cell lines (circles) and total brain lysates of *Hdac11*<sup>KO/KO</sup> mice (crosses). Note that the assay (Applied Biosystems, Catalog #Mm00523422\_m1) used in this experiment targets the non-deleted region of the *Hdac11* transcript (exon boundary 5-6) and detects a transcript in *Hdac11*<sup>KO/KO</sup> neural cells / mouse brain, albeit at lower levels than *Hdac11*<sup>WT/WT</sup> tissue and predicted to result from nonsense mediated decay.  $N = 3$  (cell lines),  $N = 4$  (brains), circles/crosses = individual sample values, bars = mean  $\pm$  SE, \* $p < 0.05$ , two-tailed unpaired Student's *t*-test. Gene expression was normalised to the geomean of *Gapdh*, *Ubc* and *Atp5b*.

Supplementary Figure 10

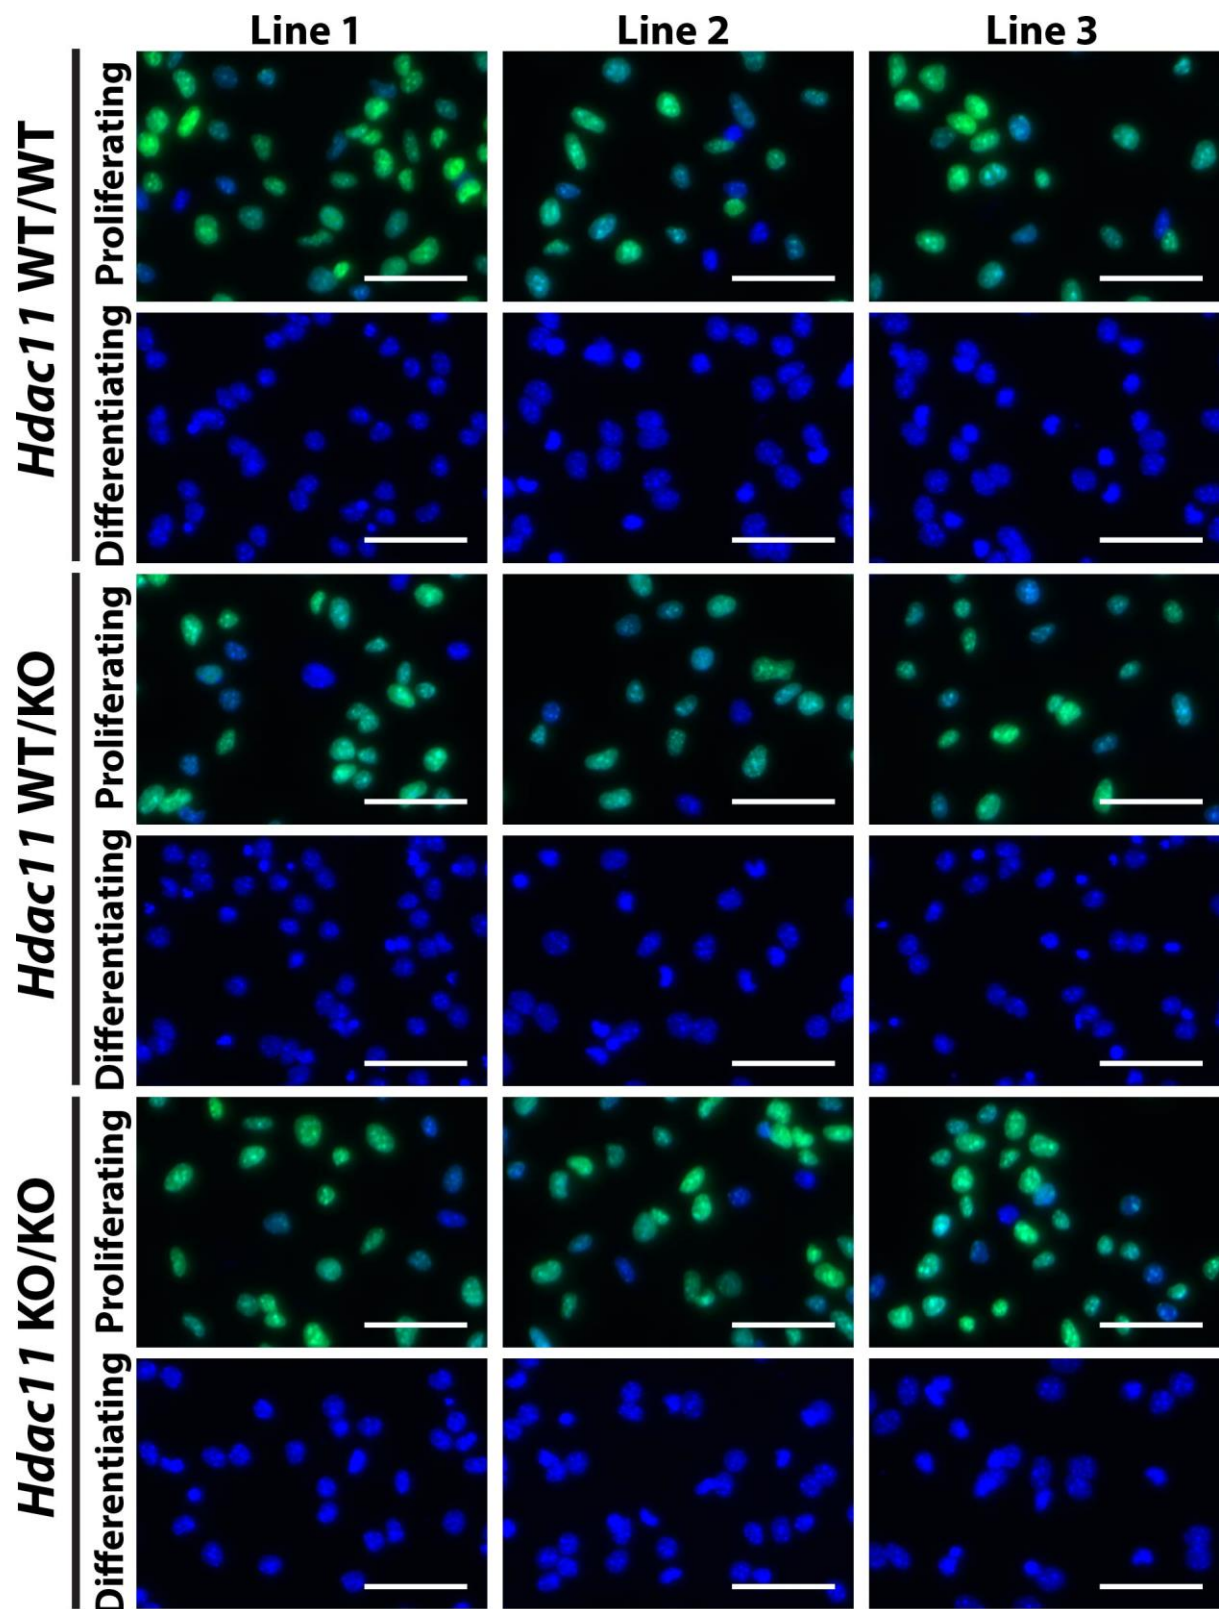

**Supplementary Figure 10: Integration of EdU into proliferating neural cells derived from *Hdac11*<sup>KO/KO</sup> mice.** Three neural cells lines were generated from E14.5 mice of each genotype (*Hdac11*<sup>WT/WT</sup>, *Hdac11*<sup>WT/KO</sup> and *Hdac11*<sup>KO/KO</sup>) and maintained in proliferation and differentiation inducing conditions for 3 days. On days 2-3 the cells were treated with EdU. Proliferating neural cells generated from mice of all genotypes display incorporation of EdU into the majority of cells. EdU was not incorporated into neural cells generated from all genotypes when they were maintained in differentiation inducing conditions. Scale bar = 50  $\mu$ m.

Supplementary Figure 11

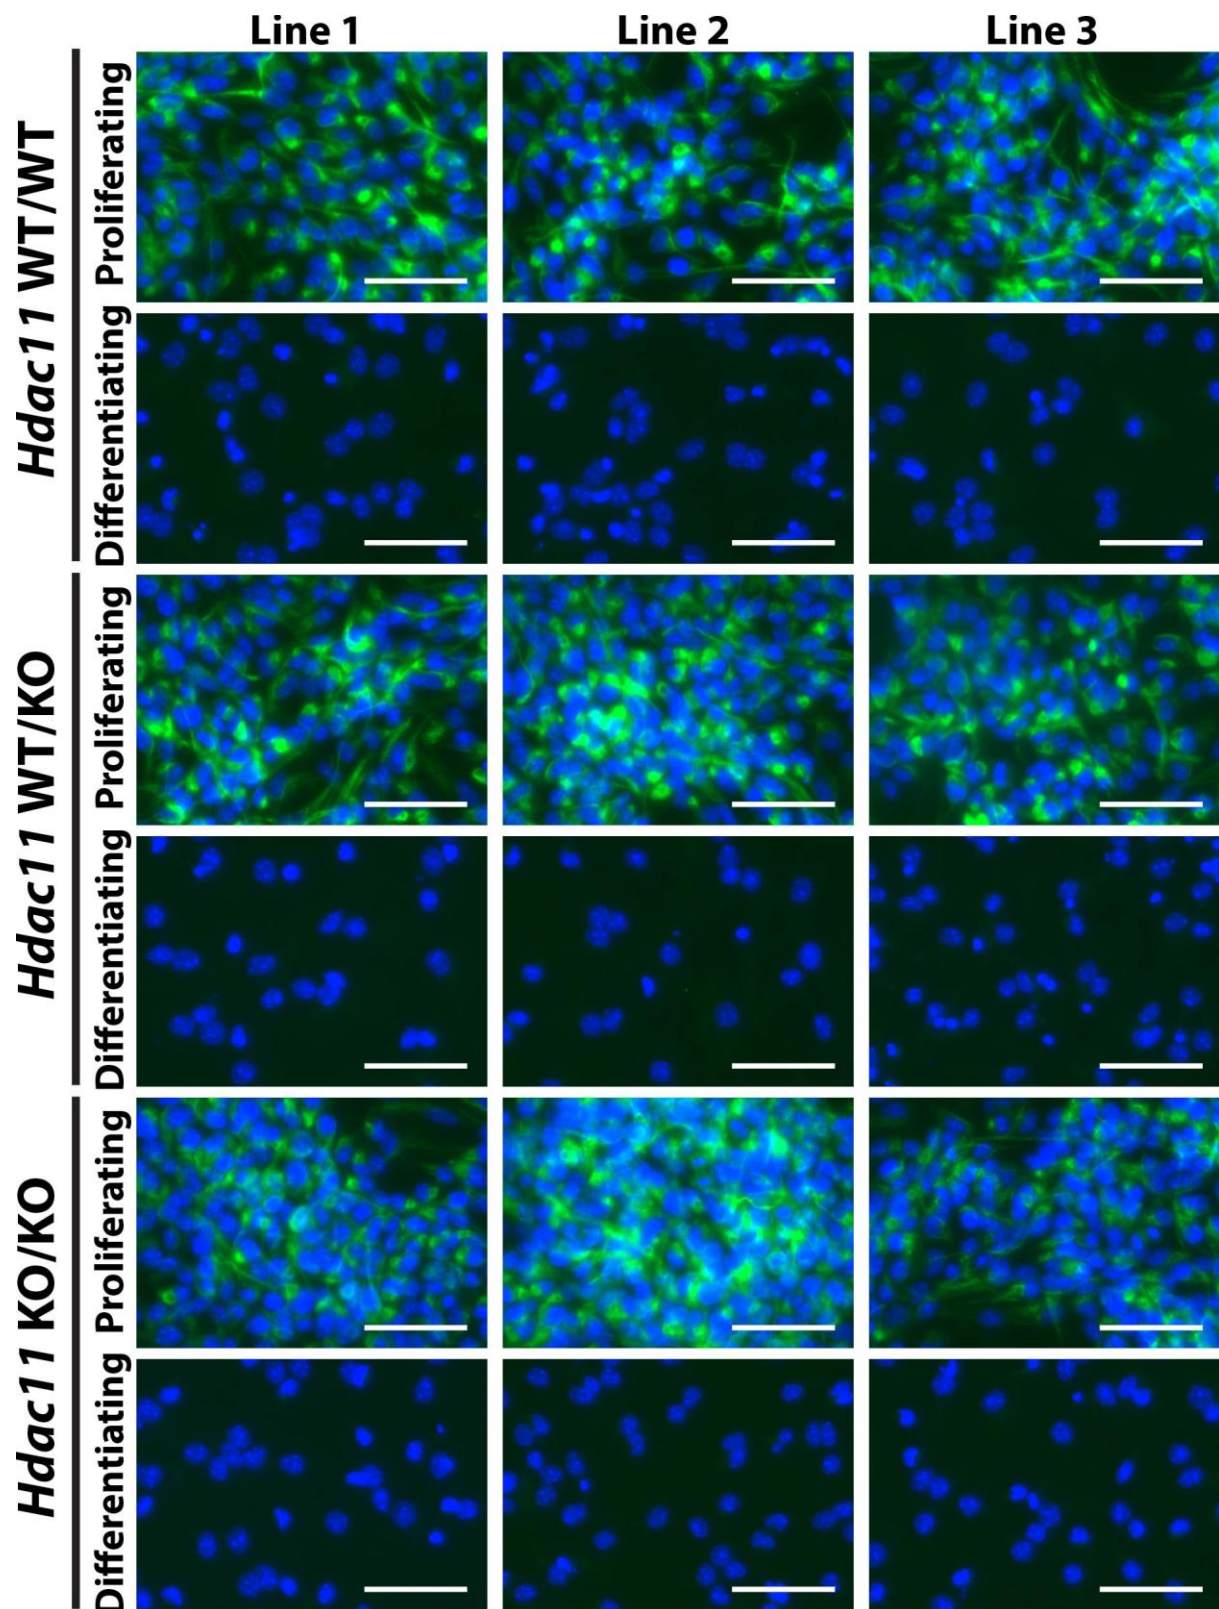

**Supplementary Figure 11: Nestin expression in proliferating neural cells derived from *Hdac11*<sup>KO/KO</sup> mice.** Three neural cells lines were generated from E14.5 mice of each genotype (*Hdac11*<sup>WT/WT</sup>, *Hdac11*<sup>WT/KO</sup> and *Hdac11*<sup>KO/KO</sup>) and maintained in proliferation and differentiation inducing conditions for 3 days. The majority of the cells were positive for neural stem cell associated marker nestin when the cells were maintained in proliferative conditions. Nearly all cells were negative for nestin when the cells were maintained in differentiation inducing conditions. Scale bar = 50  $\mu$ m.



Supplementary Figure 12

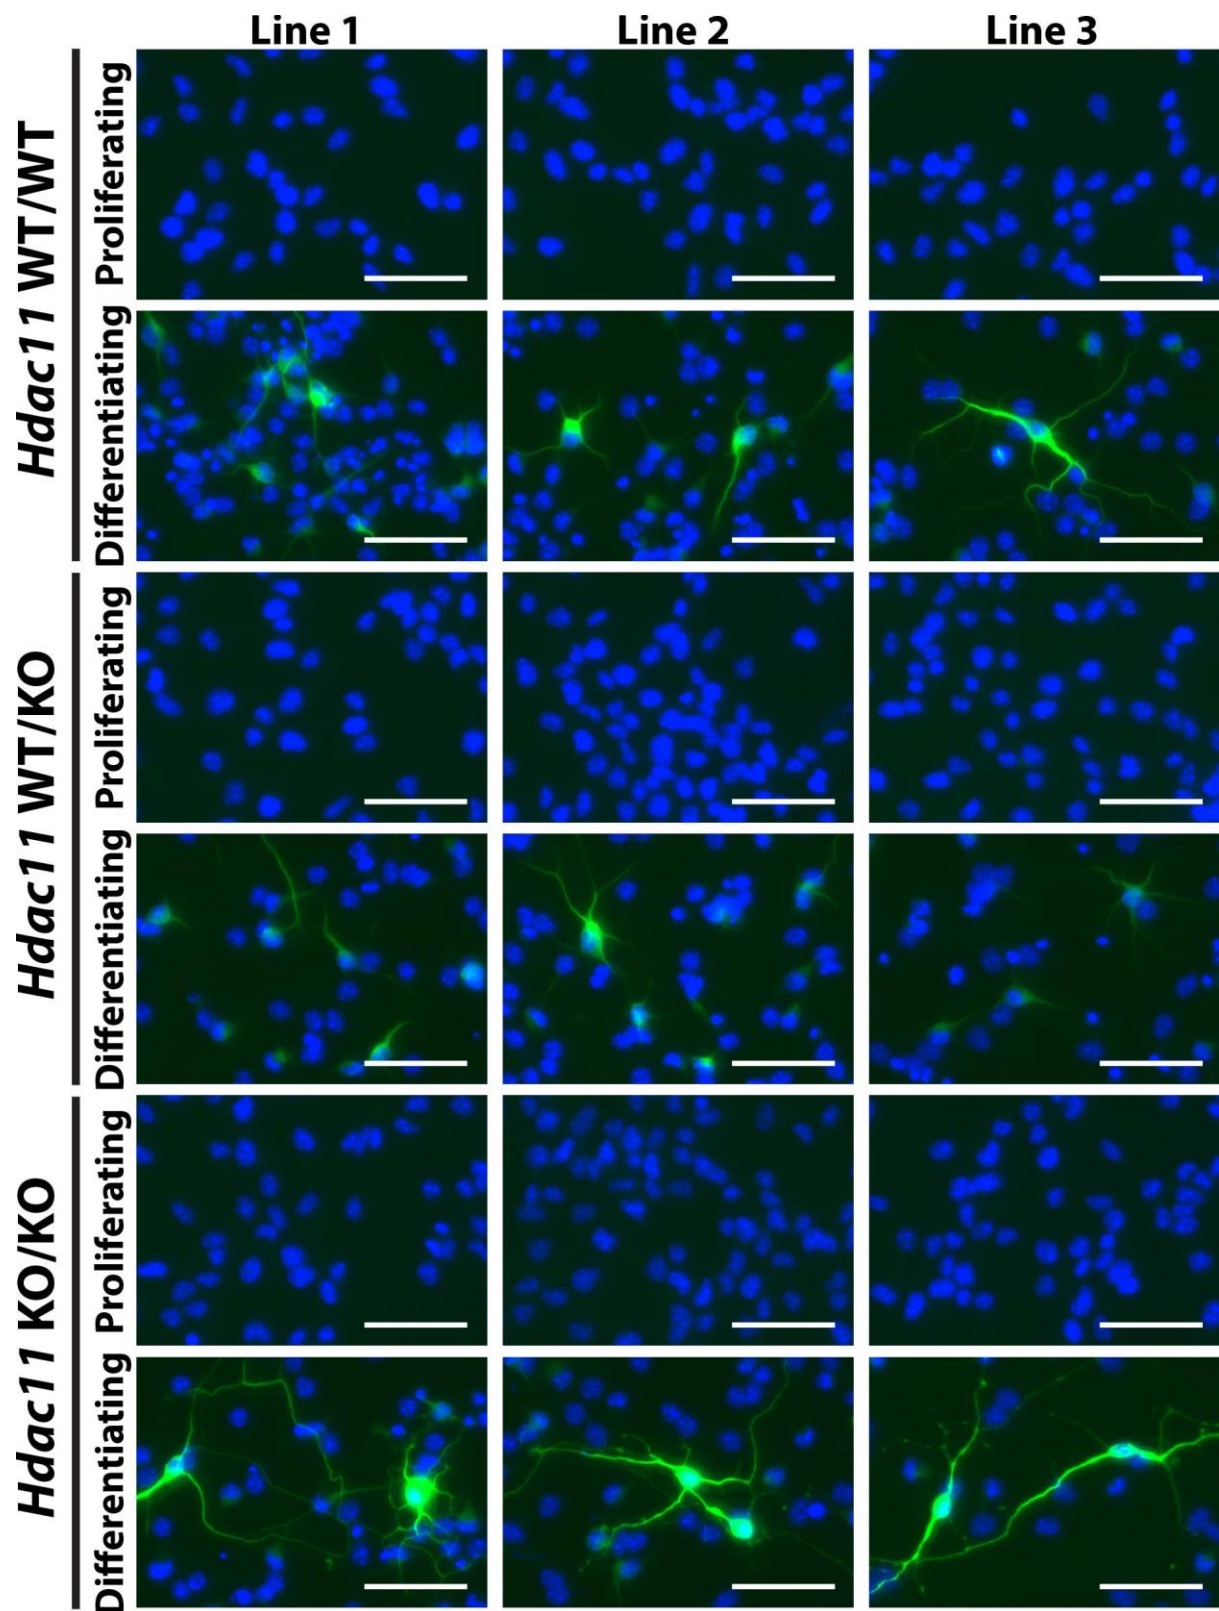

**Supplementary Figure 12: TUBB3 expression in differentiating neural cells derived from *Hdac11*<sup>KO/KO</sup> mice.** Three neural cells lines were generated from E14.5 mice of each genotype (*Hdac11*<sup>WT/WT</sup>, *Hdac11*<sup>WT/KO</sup> and *Hdac11*<sup>KO/KO</sup>) and maintained in proliferation and differentiation inducing conditions for 3 days. Nearly all cells were negative for neuron-associated marker TUBB3 when the cells were maintained in proliferative conditions. In contrast, cells positive for TUBB3 were readily identified when the cells were maintained in differentiation inducing conditions. Scale bar = 50  $\mu$ m.

Supplementary Figure 13

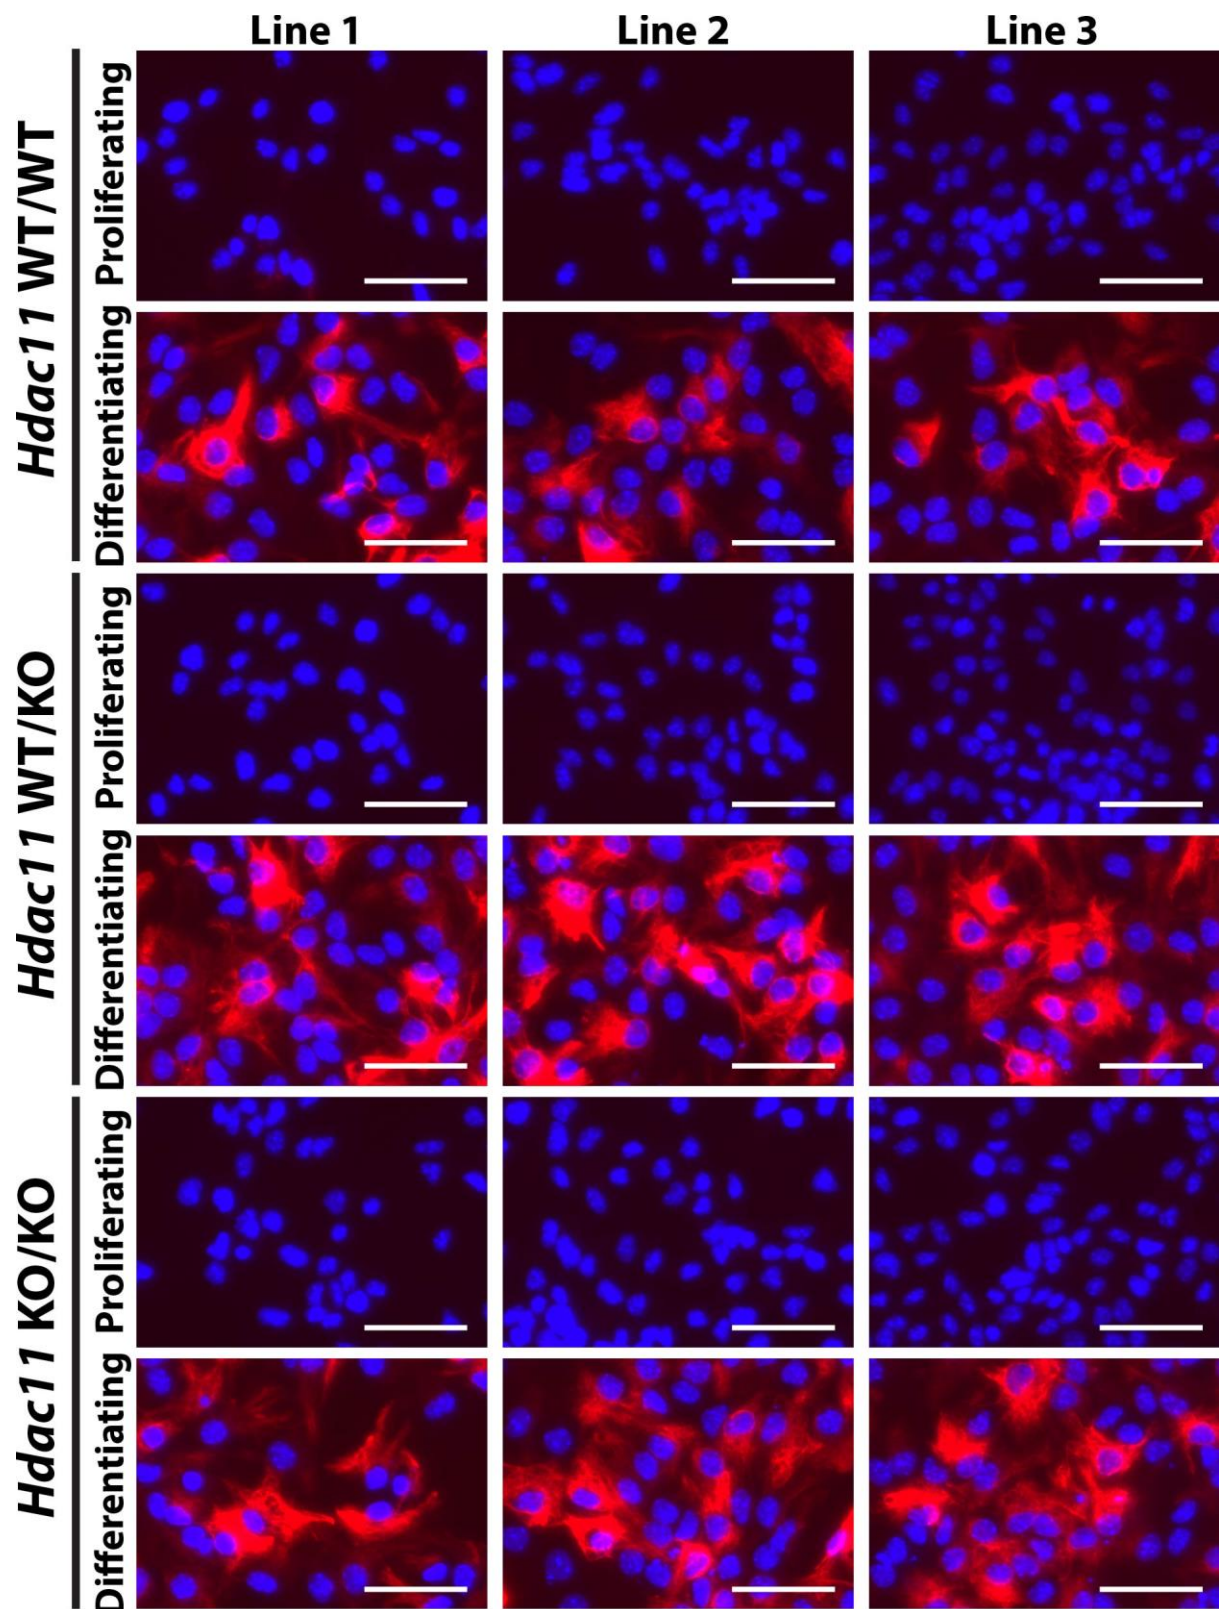

**Supplementary Figure 13: GFAP expression in differentiating neural cells derived from *Hdac11*<sup>KO/KO</sup> mice.** Three neural cells lines were generated from E14.5 mice of each genotype (*Hdac11*<sup>WT/WT</sup>, *Hdac11*<sup>WT/KO</sup> and *Hdac11*<sup>KO/KO</sup>) and maintained in proliferation and differentiation inducing conditions for 3 days. The majority of the cells were negative for astrocyte associated marker GFAP when the cells were maintained in proliferative conditions. Whereas, many cells positive for GFAP are clearly identifiable when the cells were maintained in differentiation inducing conditions. Scale bar = 50  $\mu$ m.

## Supplementary Figure 14

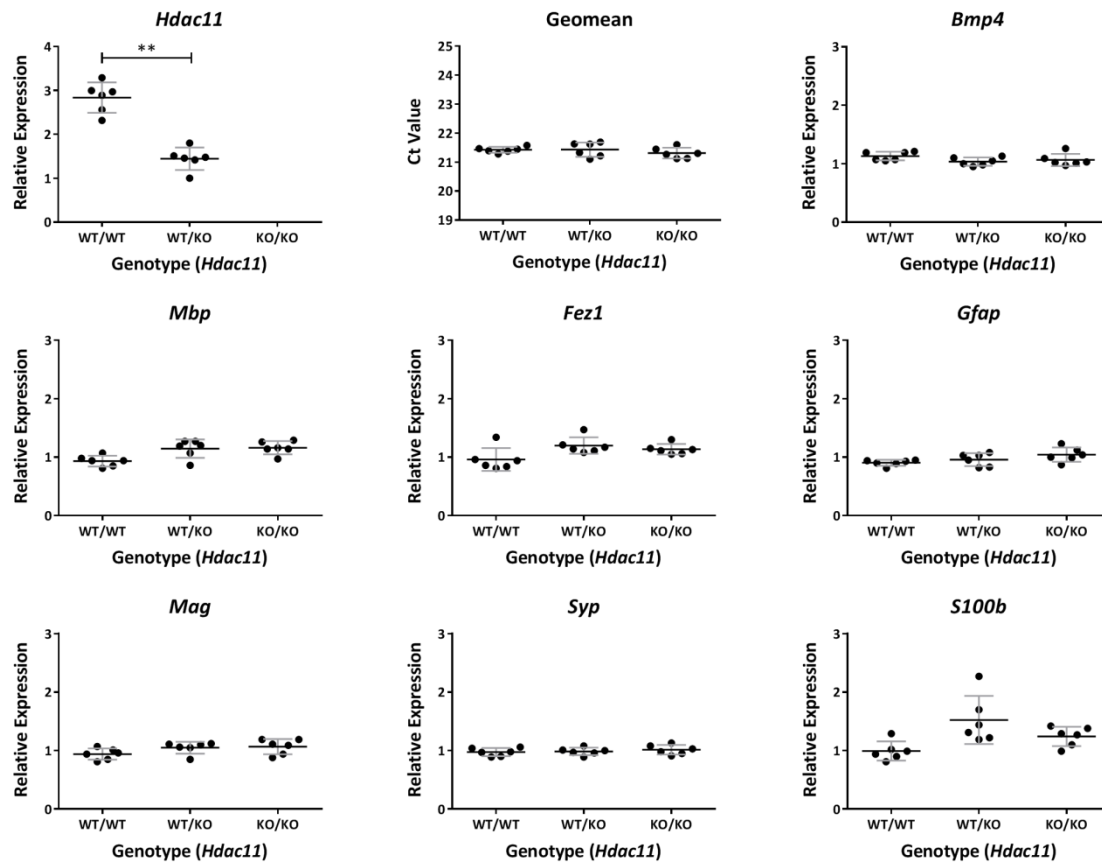

**Supplementary Figure 14: Relative gene expression in total brain lysates of *Hdac11*<sup>KO/KO</sup> mice.** There was no detectable impact on the expression of genes of interest in total brain lysates of *Hdac11*<sup>KO/KO</sup> mice.  $N = 6$ , dots = individual sample values, bars = mean  $\pm$  SD, \*\* $p < 0.01$ , two-tailed unpaired Student's  $t$ -test. Gene expression was normalised to the mean of *Gapdh* and *Sdha*.

## Supplementary Figure 15

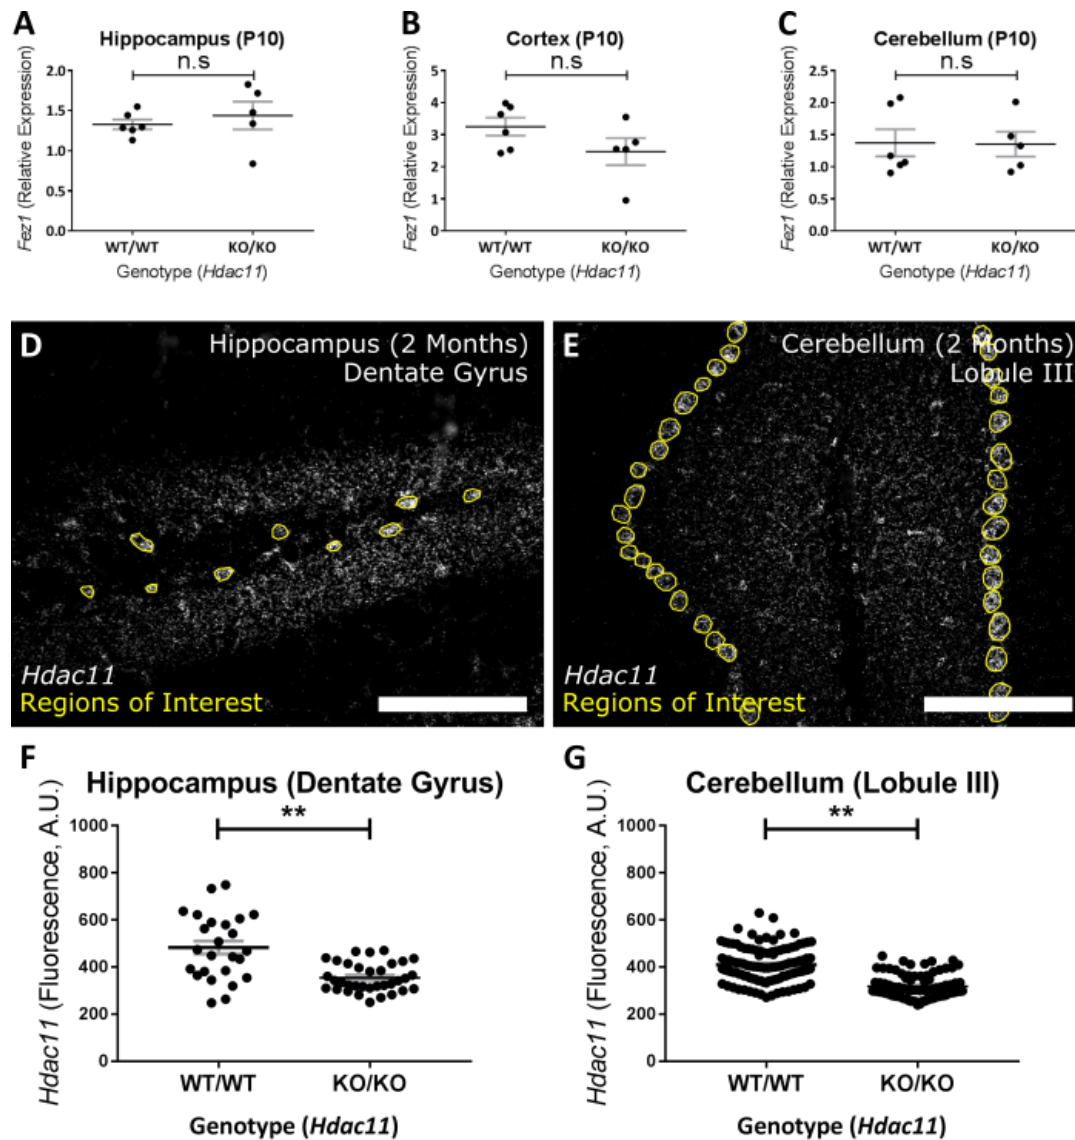

**Supplementary Figure 15: Analysis brain region specific gene expression in *Hdac11*<sup>KO/KO</sup> adult mice using qPCR and *in situ* hybridisation.** At P10, the **A**) hippocampus, **B**) cortex nor **C**) cerebellum displayed affected levels of *Fez1* expression in *Hdac11*<sup>KO/KO</sup> mice as measured by qPCR. Gene expression was normalised to the mean of *Canx* and *Sdha*. Images from *in situ* hybridisation (RNA scope) demonstrating how single *Hdac11* positive cells within the 2-month-old mouse **D**) dentate gyrus and **E**) cerebellum were selected (Regions of interest) for analysis of *Fez1* intensity. *Hdac11* expression was lower in the **F**) dentate gyrus and the **G**) cerebellum of *Hdac11*<sup>KO/KO</sup> mice. Scale bar = 200µm (**D-E**).  $N=3(n\geq 25)$  (dots = individual sample values), bars = mean  $\pm$  SE, \*\* $p < 0.01$ , two-tailed unpaired Student's *t*-test (**F-G**).

**Supplementary Table 1**

| Antibody                                                                       | Dilution | Time   |
|--------------------------------------------------------------------------------|----------|--------|
| <b>Rabbit anti-Ki67</b> (Genetex, Catalog #GTX16667)                           | 1:250    | 2 Hrs  |
| <b>Mouse anti-nestin</b> (BD Bioscience, Catalog #556309)                      | 1:500    | 2 Hrs  |
| <b>Mouse anti-TUBB3</b> (Promega, Catalog #G712A)                              | 1:1500   | 2 Hrs  |
| <b>Rabbit anti-GFAP</b> (DAKO, Catalog #Z0334)                                 | 1:500    | 2 Hrs  |
| <b>Rabbit anti-HDAC11</b> (Sigma, Catalog #H4539)                              | 1:200    | 15 Hrs |
| <b>Rabbit anti-HDAC11</b> (Abcam, Catalog #AB18973)                            | 1:200    | 15 Hrs |
| <b>Rabbit anti-HDAC11</b> (Abcam, Catalog #AB135491)                           | 1:200    | 15 Hrs |
| <b>Donkey anti-mouse IgG (H+L) AF488</b> (Life Technologies, Catalog #A21202)  | 1:500    | 1 Hr   |
| <b>Donkey anti-rabbit IgG (H+L) AF488</b> (Life Technologies, Catalog #A21206) | 1:500    | 1 Hr   |
| <b>Donkey anti-rabbit IgG (H+L) AF594</b> (Life Technologies, Catalog #A21207) | 1:500    | 1 Hr   |

**Supplementary Table 1: Antibody incubation details for immunocytochemistry.** Primary antibodies were diluted in DPBS made up of 0.1% Triton X-100 and 10% FBS. Secondary antibodies were diluted in DPBS made up of 0.1% Triton X-100 and 5% FBS.  $\leq 2$  hour incubations were carried out at room temperature whereas 15 hour incubations were kept at 4°C.

**Supplementary Table 2**

| Gene          | Assay         | Slope  | R2     | Efficiency | $E (10^{(-1/\text{slope})})$ |
|---------------|---------------|--------|--------|------------|------------------------------|
| <i>Hdac1</i>  | Mm02391771_g1 | 3.2185 | 0.9956 | 104.30     | 2.04                         |
| <i>Hdac2</i>  | Mm00515108_m1 | 3.2835 | 0.9987 | 101.58     | 1.92                         |
| <i>Hdac3</i>  | Mm00515916_m1 | 3.5171 | 0.9972 | 92.38      | 1.92                         |
| <i>Hdac4</i>  | Mm01299543_m1 | 3.4047 | 0.9995 | 96.64      | 1.97                         |
| <i>Hdac5</i>  | Mm01246076_m1 | 3.1893 | 0.9959 | 105.65     | 2.06                         |
| <i>Hdac6</i>  | Mm01341125_m1 | 3.2493 | 0.9974 | 103.01     | 2.03                         |
| <i>Hdac7</i>  | Mm00469527_m1 | 3.4438 | 1.0000 | 95.15      | 1.95                         |
| <i>Hdac8</i>  | Mm01224977_m1 | 3.2937 | 0.9982 | 101.12     | 2.01                         |
| <i>Hdac9</i>  | Mm01293999_m1 | 3.2618 | 0.9967 | 102.43     | 2.03                         |
| <i>Hdac10</i> | Mm01308118_g1 | 3.3169 | 0.9992 | 100.18     | 2.00                         |
| <i>Hdac11</i> | Mm01183513_m1 | 3.2922 | 0.9998 | 101.25     | 2.01                         |
| <i>Sirt1</i>  | Mm00490758_m1 | 3.3817 | 0.9998 | 97.56      | 1.94                         |
| <i>Sirt2</i>  | Mm01149204_m1 | 3.5177 | 0.9990 | 92.41      | 1.92                         |
| <i>Sirt3</i>  | Mm00452129_m1 | 3.1664 | 0.9977 | 106.81     | 2.07                         |
| <i>Sirt4</i>  | Mm01201915_m1 | 3.1388 | 0.9962 | 108.05     | 2.08                         |
| <i>Sirt5</i>  | Mm00663721_m1 | 3.2027 | 0.9979 | 105.13     | 2.05                         |
| <i>Sirt6</i>  | Mm01149042_m1 | 3.4577 | 0.9999 | 94.63      | 1.95                         |
| <i>Sirt7</i>  | Mm00461895_m1 | 3.4861 | 0.9998 | 93.57      | 1.94                         |
| <i>Actb</i>   | Mm00607939_s1 | 3.5435 | 0.9999 | 91.52      | 1.91                         |
| <i>Gapdh</i>  | Mm99999915_g1 | 3.4969 | 0.9994 | 93.18      | 1.93                         |

**Supplementary Table 2: TaqMan® gene expression assays used to detect expression of *Hdac* genes.** Serial dilutions (each 10-fold lower than the last) of cDNA were prepared to generate a standard curve for each TaqMan® assay. Using the slope of the curve, the primer efficiency ( $E$ ) calculations were calculated according to the equation  $E = 10^{[-1/\text{slope}]}$  as described by Pfaffl<sup>53</sup>. *Actb* and *Gapdh* are included in this list because they were used for the comparative gene expression calculation described in Supplementary Table 6.



**Supplementary Table 3**

| Assay                | Gene Name                                                                     |
|----------------------|-------------------------------------------------------------------------------|
| 18S-Hs99999901_s1    | Eukaryotic 18S rRNA                                                           |
| Msi2-Mm00475180_m1   | Musashi homolog 2 (Drosophila)                                                |
| Hes1-Mm00468601_m1   | hairy and enhancer of split 1 (Drosophila)                                    |
| Vcan-Mm01283063_m1   | versican                                                                      |
| Gnl3-Mm00463571_m1   | guanine nucleotide binding protein-like 3 (nucleolar)                         |
| Ascl1-Mm03058063_m1  | achaete-scute complex homolog 1 (Drosophila)                                  |
| Aes-Mm00507847_m1    | amino-terminal enhancer of split                                              |
| Dlx2-Mm00438427_m1   | distal-less homeobox 2                                                        |
| Mtap2-Mm00485230_m1  | microtubule-associated protein 2                                              |
| Artn-Mm00507845_m1   | artemin                                                                       |
| Tnr-Mm00659075_m1    | tenascin R                                                                    |
| Fez1-Mm00805945_m1   | fasciculation and elongation protein zeta 1 (zygin I)                         |
| Syp-Mm00436850_m1    | synaptophysin                                                                 |
| Apoe-Mm00437573_m1   | apolipoprotein E                                                              |
| S100b-Mm00485897_m1  | S100 protein, beta polypeptide, neural                                        |
| Gfap-Mm00546086_m1   | glial fibrillary acidic protein                                               |
| Slc1a3-Mm00600697_m1 | solute carrier family 1 (glial high affinity glutamate transporter), member 3 |
| Pdgfra-Mm00440701_m1 | platelet derived growth factor receptor, alpha polypeptide                    |
| Galc-Mm00484646_m1   | galactosylceramidase                                                          |
| Olig2-Mm01210556_m1  | oligodendrocyte transcription factor 2                                        |
| Canx-Mm00500330_m1   | calnexin                                                                      |
| Sdha-Mm01352366_m1   | succinate dehydrogenase complex, subunit A, flavoprotein (Fp)                 |
| Cyc1-Mm00470540_m1   | cytochrome c-1                                                                |
| Fabp7-Mm00445225_m1  | fatty acid binding protein 7, brain                                           |

**Supplementary Table 3: List of TaqMan® assays and abbreviations used in heat map on Figure 1.** Genes were selected because they were reported or predicted to be differentially expressed in proliferating and differentiating neural cells *in vitro*.

**Supplementary Table 4**

| Assay                 | Gene Name                                                                        |
|-----------------------|----------------------------------------------------------------------------------|
| 18S-Hs99999901_s1     | Eukaryotic 18S rRNA                                                              |
| Gapdh-Mm99999915_g1   | glyceraldehyde-3-phosphate dehydrogenase                                         |
| Actb-Mm00607939_s1    | actin, beta                                                                      |
| Sdha-Mm01352366_m1    | succinate dehydrogenase complex, subunit A, flavoprotein (Fp)                    |
| Ubc-Mm02525934_g1     | ubiquitin C                                                                      |
| Atp5b-Mm00443967_g1   | ATP synthase, H <sup>+</sup> transporting mitochondrial F1 complex, beta subunit |
| Ntrk1-Mm01219406_m1   | neurotrophic tyrosine kinase, receptor, type 1                                   |
| Ntrk2-Mm00435422_m1   | neurotrophic tyrosine kinase, receptor, type 2                                   |
| Ntrk3-Mm00456222_m1   | neurotrophic tyrosine kinase, receptor, type 3                                   |
| Tac1-Mm01166996_m1    | tachykinin 1                                                                     |
| P2rx3-Mm00523699_m1   | purinergic receptor P2X, ligand-gated ion channel, 3                             |
| Ret-Mm00436304_m1     | ret proto-oncogene                                                               |
| Scn9a-Mm00450762_s1   | sodium channel, voltage-gated, type IX, alpha                                    |
| Scn10a-Mm00501467_m1  | sodium channel, voltage-gated, type X, alpha                                     |
| Trpv1-Mm01246302_m1   | transient receptor potential cation channel, subfamily V, member 1               |
| Pou4f1-Mm02343791_m1  | POU domain, class 4, transcription factor 1                                      |
| Phox2b-Mm00435872_m1  | paired-like homeobox 2b                                                          |
| Neurog1-Mm00440466_s1 | neurogenin 1                                                                     |
| Neurog2-Mm00437603_g1 | neurogenin 2                                                                     |
| Runx1-Mm01213404_m1   | runt related transcription factor 1                                              |
| Runx3-Mm00490666_m1   | runt related transcription factor 3                                              |
| Pax6-Mm00443081_m1    | paired box gene 6                                                                |
| Pou5f1-Mm03053917_g1  | POU domain, class 5, transcription factor 1                                      |
| Ascl1-Mm03058063_m1   | achaete-scute complex homolog 1 (Drosophila)                                     |
| Nanog-Mm02384862_g1   | Nanog homeobox                                                                   |
| Sox17-Mm00488363_m1   | SRY-box containing gene 17                                                       |
| T-Mm01318252_m1       | brachyury                                                                        |
| Pax7-Mm01354484_m1    | paired box gene 7                                                                |
| Sox10-Mm01300162_m1   | SRY-box containing gene 10                                                       |
| Sox1-Mm00486299_s1    | SRY-box containing gene 1                                                        |
| Foxg1-Mm02059886_s1   | forkhead box G1                                                                  |
| Syp-Mm00436850_m1     | synaptophysin                                                                    |
| Dlg4-Mm00492193_m1    | discs, large homolog 4 (Drosophila)                                              |
| Emx1-Mm01182609_m1    | empty spiracles homeobox 1                                                       |
| Nkx2-1-Mm00447558_m1  | NK2 homeobox 1                                                                   |
| Slc17a7-Mm00812886_m1 | solute carrier family 17 (sodium-dependent inorganic                             |

|                       |                                                                                         |
|-----------------------|-----------------------------------------------------------------------------------------|
|                       | phosphate cotransporter), member 7                                                      |
| Slc17a6-Mm00499876_m1 | solute carrier family 17 (sodium-dependent inorganic phosphate cotransporter), member 6 |
| Dlk1-Mm00494477_m1    | delta-like 1 homolog (Drosophila)                                                       |
| Isl1-Mm00517585_m1    | ISL1 transcription factor, LIM/homeodomain                                              |
| Prph-Mm00449704_m1    | peripherin                                                                              |
| Snai2-Mm00441531_m1   | snail homolog 2 (Drosophila)                                                            |
| Snai1-Mm00441533_g1   | snail homolog 1 (Drosophila)                                                            |
| Emx2-Mm00550241_m1    | empty spiracles homeobox 2                                                              |
| En1-Mm00438709_m1     | engrailed 1                                                                             |
| Gbx2-Mm00494578_m1    | gastrulation brain homeobox 2                                                           |
| Hoxb4-Mm00657964_m1   | homeobox B4                                                                             |
| Hoxb9-Mm01700220_m1   | homeobox B9                                                                             |
| Gad2-Mm00484623_m1    | glutamic acid decarboxylase 2                                                           |

**Supplementary Table 4: List of TaqMan® assays and abbreviations used in heat map on Figure 3.** Genes were selected because they were reported or predicted to be differentially expressed between the central and peripheral nervous system. Particularly with a specific intention to include genes expressed in the dorsal root ganglion.

**Supplementary Table 5**

| Antibody                                                                   | Temp. | Milk | Dilution     | Time   |
|----------------------------------------------------------------------------|-------|------|--------------|--------|
| Rabbit anti-HDAC11 ( <b>Sigma, Catalog #H4539</b> )                        | 4°C   | 1%   | 1:1000       | 15 Hrs |
| Rabbit anti-HDAC11 ( <b>Abcam, Catalog #AB18973</b> )                      | 4°C   | 1%   | 1:500        | 15 Hrs |
| Rabbit anti-HDAC11 ( <b>Abcam, Catalog #AB135491</b> )                     | 4°C   | 1%   | 1:500        | 15 Hrs |
| Rabbit anti-HDAC11 ( <b>Millipore, Catalog #09-827</b> )                   | 4°C   | 1%   | 1:500        | 15 Hrs |
| Mouse anti-synaptophysin (SYP) [SY38] ( <b>Abcam, Catalog #8049</b> )      | 4°C   | 1%   | 1:5000       | 15 Hrs |
| Mouse anti-SNAP25 ( <b>DB Transduction Laboratories, Catalog #610366</b> ) | 4°C   | 1%   | 1:5000       | 15 Hrs |
| Rabbit anti-mitofuscin 2 ( <b>Abcam, Catalog #ab50838</b> )                | 4°C   | 1%   | 1.0<br>µg/ml | 15 Hrs |
| Mouse anti-alpha tubulin, DM1A ( <b>Sigma, Catalog #T9026</b> )            | RT    | None | 1:40000      | 1 Hr   |
| Rabbit anti-histone H3, CT, Pan ( <b>Millipore, Catalog #07-690</b> )      | RT    | None | 1:25000      | 1 Hr   |
| Mouse anti-GAPDH ( <b>Millipore, Catalog #MAB374</b> )                     | RT    | None | 1:2000       | 1 Hr   |
| Goat anti-mouse IgG HRP ( <b>Thermo Sci. Catalog #31430</b> )              | RT    | None | 1:4000       | 1 Hr   |
| Goat anti-rabbit IgG HRP ( <b>DAKO, Catalog #P0448</b> )                   | RT    | None | 1:4000       | 1 Hr   |
| Rabbit anti-goat IgG HRP ( <b>DAKO, Catalog #PO449</b> )                   | RT    | None | 1:4000       | 1 Hr   |

**Supplementary Table 5: Antibody incubation details for western blotting.** Reagents were diluted in PBS made up with 0.1% Tween-20. Blots were incubated on a shaker to maintain movement of the solution.

**Supplementary Table 6**

| Gene          | Expression  | ±<br>StdDev |
|---------------|-------------|-------------|
| <i>Actb</i>   | 23.52       | 1.84        |
| <i>Sirt2</i>  | 5.78        | 0.60        |
| <i>Hdac2</i>  | 2.62        | 0.21        |
| <i>Hdac11</i> | <b>0.98</b> | <b>0.11</b> |
| <i>Hdac3</i>  | 0.80        | 0.20        |
| <i>Hdac5</i>  | 0.62        | 0.11        |
| <i>Hdac9</i>  | 0.55        | 0.15        |
| <i>Sirt1</i>  | 0.53        | 0.40        |
| <i>Hdac1</i>  | 0.53        | 0.03        |
| <i>Hdac4</i>  | 0.33        | 0.08        |
| <i>Hdac6</i>  | 0.23        | 0.01        |
| <i>Sirt3</i>  | 0.23        | 0.03        |
| <i>Sirt7</i>  | 0.22        | 0.02        |
| <i>Hdac10</i> | 0.15        | 0.02        |
| <i>Sirt6</i>  | 0.13        | 0.04        |
| <i>Hdac8</i>  | 0.12        | 0.04        |
| <i>Sirt5</i>  | 0.10        | 0.02        |
| <i>Sirt4</i>  | 0.06        | 0.03        |
| <i>Hdac7</i>  | 0.05        | 0.01        |

**Supplementary Table 6: Comparative expression of *Hdac* genes and *Actb* in mouse brain.** Samples were cDNA prepared from lysates of whole brain tissue from *Hdac11*<sup>WT/WT</sup> mice ( $N=4$ ). Expression between genes was calculated according to method reported by Pfaffl (2001) using the formula  $E^{-(Ct\ Target - Ct\ Ref)}$ . In this formula:  $E$  = primer efficiency; Ct Target = crossing threshold of gene of interest; and Ct Ref = crossing threshold of *Gapdh*. Primer efficiencies are listed on Supplementary Table 2. This calculation was carried out for each sample. The value of each sample was then normalised to the median value of that calculated for *Hdac11*. The average expression value and standard deviation are listed in the table.

**Supplementary Table 7**

| <b>Gene</b>   | <b>Proliferating</b> | <b>Differentiating</b> |
|---------------|----------------------|------------------------|
| <i>Msi2</i>   | 0.1043               | 0.2404                 |
| <i>Hes1</i>   | 0.3719               | 0.8615                 |
| <i>Vcan</i>   | 0.6496               | 0.4552                 |
| <i>Gnl3</i>   | 0.4820               | 0.5971                 |
| <i>Ascl1</i>  | 0.9146               | 0.0655                 |
| <i>Aes</i>    | 0.0773               | 0.0027                 |
| <i>Dlx2</i>   | 0.3434               | 0.0662                 |
| <i>Mtap2</i>  | 0.0314               | 0.0576                 |
| <i>Artn</i>   | 0.3574               | 0.1640                 |
| <i>Tnr</i>    | 0.8898               | 0.0008                 |
| <i>Fez1</i>   | 0.0092               | 0.0296                 |
| <i>Syp</i>    | 0.9329               | 0.8043                 |
| <i>Apoe</i>   | 0.5693               | 0.1843                 |
| <i>S100b</i>  | 0.8535               | 0.0466                 |
| <i>Gfap</i>   | 0.0098               | 0.0601                 |
| <i>Slc1a3</i> | 0.2866               | 0.5925                 |
| <i>Pdgfra</i> | 0.1909               | 0.0982                 |
| <i>Galc</i>   | 0.5866               | 0.8341                 |
| <i>Olig2</i>  | 0.7073               | 0.7949                 |
| <i>Cyc1</i>   | 0.1178               | 0.6539                 |
| <i>Fabp7</i>  | 0.2811               | 0.0031                 |

**Supplementary Table 7: List of *p*-values from analysis of gene expression profile in neural cells derived from *Hdac11*<sup>WT/WT</sup> and *Hdac11*<sup>KO/KO</sup> mice.** *p*-values were calculated from comparing the 2<sup>^-ΔΔCt</sup> of neural cells derived from *Hdac11*<sup>WT/WT</sup> and *Hdac11*<sup>KO/KO</sup> mice in a) proliferative conditions and b) differentiation inducing conditions. Statistically significant values are highlighted. The 2<sup>^-ΔΔCt</sup> values used in this analysis correspond to those illustrated in heat map shown in Fig. 6E and the *p*-values were calculated using a two-tailed t-test, *N*=3, shaded boxes = *p*<0.05.

**Supplementary Table 8**

| Gene          | Hippocampus |        | Cortex |        | Cerebellum |       | Spinal C. |
|---------------|-------------|--------|--------|--------|------------|-------|-----------|
|               | 2 Mth       | P10    | 2 Mth  | P10    | 2 Mth      | P10   | 2 Mth     |
| <i>Hdac11</i> | 0.006       | <0.001 | <0.001 | <0.001 | <0.001     | 0.002 | 0.034     |
| <i>Fez1</i>   | 0.005       | 0.526  | 0.822  | 0.146  | 0.627      | 0.943 | 0.950     |
| <i>Mbp</i>    | 0.107       | 0.879  | 0.781  | 0.074  | 0.849      | 0.635 | 0.361     |
| <i>Plp1</i>   | 0.145       | 0.727  | 0.633  | 0.086  | 0.467      | 0.954 | 0.331     |

**Supplementary Table 8: List of *p*-values from analysis of *Hdac11*, *Fez1*, *Mbp* and *Plp1* gene expression in neural tissue dissected from *Hdac11*<sup>WT/WT</sup> and *Hdac11*<sup>KO/KO</sup> mice. *p*-values were calculated from comparing the 2<sup>-ΔΔCt</sup> of tissue dissected from *Hdac11*<sup>WT/WT</sup> and *Hdac11*<sup>KO/KO</sup> mice. Spinal cord tissue was only dissected from 2-month-old mice. Statistically significant values are highlighted. *N*=5-6, two-tailed unpaired Student's *t*-test, shaded boxes = *p*<0.05.**
